# Supplementary material
Source: PubMed Central journal article supplement (PMC2856329)
Supplement: NIHMS144017-supplement-supplemental_data_kino_et_al.pdf [file NIHMS144017-supplement-supplemental_data_kino_et_al.pdf]

Supplementary Materials for  
**Brx Mediates the Response of Lymphocytes to Osmotic Stress Through  
the Activation of NFAT5**

Tomoshige Kino,\* Hiroaki Takatori, Irini Manoli, Yonghong Wang, Anatoly Tiulpakov,  
Marc R. Blackman, Yan A. Su, George P. Chrousos, Alan H. DeCherney, James H.  
Segars

\*To whom correspondence should be addressed. E-mail: kinot@mail.nih.gov

Published 10 February 2009, *Sci. Signal.* **2**, ra5 (2009)  
DOI: 10.1126/scisignal.2000081

**The PDF file includes:**

Fig. S1. Brx-specific siRNAs suppress the expression of *brx* mRNA and attenuate osmotic stimulus-induced expression of *nfat5* mRNA in Jurkat cells.  
Table S1. Primer pairs used in real-time RT-PCR assays.

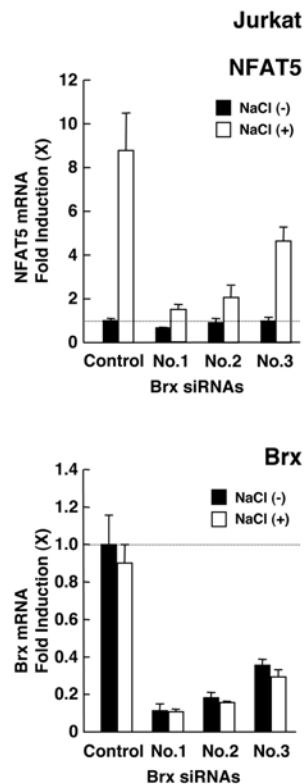

**Fig. S1.** Brx-specific siRNAs suppress the expression of *brx* mRNA and attenuate osmotic stimulus–induced expression of *nfat5* mRNA in Jurkat cells. Jurkat cells were transfected with control or Brx-specific siRNAs and incubated with 100 mM NaCl. Data shown represent the mean fold-difference  $\pm$  SEM in the expression of *nfat5* (top panel) and *brx* (bottom panel) mRNAs compared to baseline (which was obtained from cells transfected with control siRNA and incubated in the absence of NaCl). Sequences of Brx-specific siRNAs used are: No. 1: 5'-AAAGCCAGAGGAAGAGCAUUUdTdT-3' (which targets nucleotides 219 to 239 of the human *brx* coding region); No. 2: 5'-AGGAAGAUUUGAAACGGAAAdTdT-3' (nucleotides 2682 to 2691); and No. 3: 5'-CAGUGAUCUCUUUAAAGAAAdTdT-3' (nucleotides 2514 to 2533).

**Table S1.** Primer pairs used in real-time RT-PCR assays.

| <b>Gene Name</b>   |         | <b>Primer Sequence</b>        |
|--------------------|---------|-------------------------------|
| <b>Mouse Genes</b> |         |                               |
| AQP2               | Forward | 5'-CATCCTCCATGAGATTACC-3'     |
|                    | Reverse | 5'-CTGCATGGTCAGGAAGAG-3'      |
| AR                 | Forward | 5'-GCAGGATCTCTTCATTGTG-3'     |
|                    | Reverse | 5'-GTAGAGATCCAGGTAGTC-3'      |
| ATA2               | Forward | 5'-CGATAACCATGCAGAACATTGG-3'  |
|                    | Reverse | 5'-CAGAAGGACCAGATAGTC-3'      |
| BAFF               | Forward | 5'-CATTTGTTCCATGGCTTCTC-3'    |
|                    | Reverse | 5'-GCAAAGATGGGGTCCGTGTATAG-3' |
| BGT1               | Forward | 5'-CAACAAGTACCACAACAACACTG-3' |
|                    | Reverse | 5'-CTCAGCCACTTCAGAAATGG-3'    |
| Brx                | Forward | 5'-GAGCCTGGTGAAGGATGTG-3'     |
|                    | Reverse | 5'-GTCCTCCTTGGCGAACATCTG-3'   |
| NFAT1              | Forward | 5'-GATCCCCTCCAAGATATGG-3'     |
|                    | Reverse | 5'-CACATGGCCCCAGGAACTC-3'     |
| NFAT2              | Forward | 5'-GGTAACACCACCCAGTATACC-3'   |
|                    | Reverse | 5'-CTCCAGTGCTGTCTTTGC-3'      |
| NFAT3              | Forward | 5'-GCTTCGAAATTCAGACATTGAG-3'  |
|                    | Reverse | 5'-CACTCGATGGGCACTGATG-3'     |
| NFAT4              | Forward | 5'-CCAGTGGAAAAGTTCTTTCTC-3'   |
|                    | Reverse | 5'-CCAGTCACAATCATTTCG-3'      |
| NFAT5              | Forward | 5'-CAGAGCTGCAGTATGTG-3'       |
|                    | Reverse | 5'-CCTCTGCTTTGGATTTTCG-3'     |
| NFκB RelA (p65)    | Forward | 5'-GACATTGAGGTGTATTTAC-3'     |
|                    | Reverse | 5'-GAGGAGTCCGGAACACAATGG-3'   |
| NFκB p105 (p50)    | Forward | 5'-GTGGGGCCTGCAAAGGTTATCG-3'  |
|                    | Reverse | 5'-CTGCTGTTACGGTGCATACC-3'    |
| Osp94              | Forward | 5'-CCAAGAATTGGAACTTCAC-3'     |
|                    | Reverse | 5'-CAGATTCTGCTTCTCAATTACTG-3' |
| RPLP0              | Forward | 5'-GAGGACCTCACTGAGATTTCG-3'   |
|                    | Reverse | 5'-CTGGAAGAAGGAGGTCTTCTC-3'   |
| SMIT               | Forward | 5'-GCAGACTAAGGTCAAGTC-3'      |
|                    | Reverse | 5'-CTCCTTGGAGCGGAACTG-3'      |
| TauT               | Forward | 5'-GCATCCATCGTCATTGTG-3'      |
|                    | Reverse | 5'-CACATGGCCCCAGGAACTC-3'     |
| TNFα               | Forward | 5'-CACGCTCTTCTGTCTACTG-3'     |
|                    | Reverse | 5'-GTGGGCTACAGGCTTGTC-3'      |
| <b>Human Genes</b> |         |                               |
| AR                 | Forward | 5'-CTGGACCTCTACCTTATTCAC-3'   |
|                    | Reverse | 5'-CTTCATCCACCAGCTCTTC-3'     |
| BAFF               | Forward | 5'-CTTGTTCCAGTTAACATTACC-3'   |
|                    | Reverse | 5'-CAGGACCTGACTATAGAG-3'      |

|                   |         |                              |
|-------------------|---------|------------------------------|
| Brx               | Forward | 5'-CAGTGATGACATGGACAG-3'     |
|                   | Reverse | 5'-TCGGTGGATGAACTGGATC-3'    |
| HSP70-2           | Forward | 5'-CACAGCGCGGTCATAACG-3'     |
|                   | Reverse | 5'-GATGATGCGCAGCACATTGAG-3'  |
| NFAT5             | Forward | 5'-CTGATGACTCCACTCATACC-3'   |
|                   | Reverse | 5'-GTTTGCTGAGTTGATCCAACAG-3' |
| p38 MAPK $\alpha$ | Forward | 5'-GTCTGTTGGACGTTTTTACAC-3'  |
|                   | Reverse | 5'-GAACATGGTCATCTGTAAGC-3'   |
| RPLP0             | Forward | 5'-CGCGACCTGGAAGTCCAAC-3'    |
|                   | Reverse | 5'-CCATCAGCACCCACAGCCTTC-3'  |
| Vav1              | Forward | 5'-CAAGATGGACAGGTATGC-3'     |
|                   | Reverse | 5'-GCTCCACTTCTTGTTGTC-3'     |
